# Supplementary material
Source: PubMed Central journal article supplement (PMC9520442)
Supplement: jamapsychiatry-e222990-s001.pdf [file jamapsychiatry-e222990-s001.pdf]

## Supplemental Online Content

Gibbons RD, Hur K, Lavigne JE, Mann JJ. Association between folic acid prescription fills and suicide attempts and intentional self-harm among privately insured US adults. *JAMA Psychiatry*. Published online September 28, 2022.  
doi:10.1001/jamapsychiatry.2022.2990

**eTable.** ICD-9-CM and ICD-10-CM diagnostic codes for identifying suicide attempt, intentional self-harm, and other diagnoses included in the statistical models

This supplemental material has been provided by the authors to give readers additional information about their work.

eTable. ICD-9-CM and ICD-10-CM diagnostic codes for identifying suicide attempt, intentional self-harm, and other diagnoses included in the statistical models

| Diagnosis                                            | ICD-9-CM                                                                   | ICD-10-CM                                                                                                                                                                                                                                                                                                                                                                                                                                                                                                                 |
|------------------------------------------------------|----------------------------------------------------------------------------|---------------------------------------------------------------------------------------------------------------------------------------------------------------------------------------------------------------------------------------------------------------------------------------------------------------------------------------------------------------------------------------------------------------------------------------------------------------------------------------------------------------------------|
| <b>Intentional self-harm due to:</b>                 |                                                                            |                                                                                                                                                                                                                                                                                                                                                                                                                                                                                                                           |
| Non-Fatal Suicide Attempts and Intentional Self-Harm | E950-E959                                                                  | T36–T50 with the 6th character of the code = 2 (except for T36.9, T37.9, T39.9, T41.4, T42.7, T43.9, T45.9, T47.9, and T49.9, which are included if the 5th character of the code = 2)<br>T51–T65 with the 6th character of the code = 2 (except for T51.9, T52.9, T53.9, T54.9, T56.9, T57.9, T58.0, T58.1, T58.9, T59.9, T60.9, T61.0, T61.1, T61.9, T62.9, T63.9, T64.0, T64.8, and T65.9, which are included if the 5th character of the code = 2)<br>T71 with the 6th character of the code = 2<br>T14.91<br>X71-X83 |
| <b>Other included diagnoses</b>                      |                                                                            |                                                                                                                                                                                                                                                                                                                                                                                                                                                                                                                           |
| Substance use disorder                               | 291, 292, 303, 304, 305 (except 305.1)                                     | F10-F19 (except F17)                                                                                                                                                                                                                                                                                                                                                                                                                                                                                                      |
| Depressive disorder                                  | 296.2, 296.3, 300.4, 311                                                   | F32, F33, F34.1                                                                                                                                                                                                                                                                                                                                                                                                                                                                                                           |
| Anxiety/stress/adjustment disorder                   | 300.0, 300.2, 300.3, 308, 309.0, 309.24-309.9                              | F40-F43                                                                                                                                                                                                                                                                                                                                                                                                                                                                                                                   |
| Attention-deficit/hyperactivity disorder             | 314                                                                        | F90                                                                                                                                                                                                                                                                                                                                                                                                                                                                                                                       |
| Bipolar/other mood disorder                          | 296 (except 296.2, 296.3)                                                  | F30-F39 (except F32, F33, F34.1)                                                                                                                                                                                                                                                                                                                                                                                                                                                                                          |
| Schizophrenia                                        | 295, 297, 298                                                              | F20-F29                                                                                                                                                                                                                                                                                                                                                                                                                                                                                                                   |
| Sleep disorder                                       | 307.4, 327, 347, 780.5                                                     | F51.01, F51.03, F51.09, F51.11, F51.12, F51.19, F51.3, F51.8, G47                                                                                                                                                                                                                                                                                                                                                                                                                                                         |
| Pain                                                 | 339,346,7840,7280, 72881, 7291, 354-357, 830-854, 860-887,890-897, 900-959 | G43, G44, R51, M60, M791, M797, G56-G59, G629, M792, S00-S78 excluding Sx2, S798, S799, S80, S81, S83-S88, S898, S899, S90, S91, S93-S99, T07, T14-T28, T30-T34, T79                                                                                                                                                                                                                                                                                                                                                      |
| Crohn's disease                                      | 5559                                                                       | K5090                                                                                                                                                                                                                                                                                                                                                                                                                                                                                                                     |
| Celiac disease                                       | 5790                                                                       | K900                                                                                                                                                                                                                                                                                                                                                                                                                                                                                                                      |
